# Supplementary material for: Long-term survival of patients with stage III colon cancer treated with VRP-CEA(6D), an alphavirus vector that increases the CD8+ effector memory T cell to Treg ratio
Source: PubMed Central journal article supplement (PMC7661359; doi:10.1136/jitc-2020-001662), 2020-11-11
Supplement: jitc-2020-001662supp002.pdf [file jitc-2020-001662supp002.pdf]

| <b>Supplementary Table 2. All reported adverse events</b>             |                |            |               |            |                 |            |                   |            |                 |            |              |
|-----------------------------------------------------------------------|----------------|------------|---------------|------------|-----------------|------------|-------------------|------------|-----------------|------------|--------------|
| <b>Grade of Adverse Event</b>                                         | <b>1- Mild</b> |            | <b>2- Mod</b> |            | <b>3-Severe</b> |            | <b>4- LifeThr</b> |            | <b>5-Lethal</b> |            | <b>Total</b> |
|                                                                       | <b>n</b>       | <b>(%)</b> | <b>n</b>      | <b>(%)</b> | <b>n</b>        | <b>(%)</b> | <b>n</b>          | <b>(%)</b> | <b>n</b>        | <b>(%)</b> |              |
| <b>Non-Hematologic Adverse Events</b>                                 |                |            |               |            |                 |            |                   |            |                 |            |              |
| Eye disorders - Other, Specify                                        | 1              | 8%         | 0             | 0%         | 0               | 0%         | 0                 | 0%         | 0               | 0%         | 12           |
| General disorders and administration site conditions - Other, Specify | 1              | 8%         | 0             | 0%         | 0               | 0%         | 0                 | 0%         | 0               | 0%         | 12           |
| <b>Endocrine disorders</b>                                            |                |            |               |            |                 |            |                   |            |                 |            |              |
| Hyperthyroidism                                                       | 0              | 0%         | 1             | 8%         | 0               | 0%         | 0                 | 0%         | 0               | 0%         | 12           |
| <b>Gastrointestinal disorders</b>                                     |                |            |               |            |                 |            |                   |            |                 |            |              |
| Abdominal pain                                                        | 1              | 8%         | 1             | 8%         | 0               | 0%         | 0                 | 0%         | 0               | 0%         | 12           |
| Constipation                                                          | 1              | 8%         | 1             | 8%         | 0               | 0%         | 0                 | 0%         | 0               | 0%         | 12           |
| Diarrhea                                                              | 1              | 8%         | 2             | 17%        | 0               | 0%         | 0                 | 0%         | 0               | 0%         | 12           |
| Rectal hemorrhage                                                     | 1              | 8%         | 0             | 0%         | 0               | 0%         | 0                 | 0%         | 0               | 0%         | 12           |
| <b>General disorders and administration site conditions</b>           |                |            |               |            |                 |            |                   |            |                 |            |              |
| Fatigue                                                               | 0              | 0%         | 1             | 8%         | 0               | 0%         | 0                 | 0%         | 0               | 0%         | 12           |
| Fever                                                                 | 2              | 17%        | 0             | 0%         | 0               | 0%         | 0                 | 0%         | 0               | 0%         | 12           |
| Flu like symptoms                                                     | 1              | 8%         | 0             | 0%         | 0               | 0%         | 0                 | 0%         | 0               | 0%         | 12           |
| Injection site reaction                                               | 3              | 25%        | 0             | 0%         | 0               | 0%         | 0                 | 0%         | 0               | 0%         | 12           |
| Pain                                                                  | 2              | 17%        | 0             | 0%         | 0               | 0%         | 0                 | 0%         | 0               | 0%         | 12           |
| <b>Infections and infestations</b>                                    |                |            |               |            |                 |            |                   |            |                 |            |              |
| Mucosal infection                                                     | 0              | 0%         | 1             | 8%         | 0               | 0%         | 0                 | 0%         | 0               | 0%         | 12           |
| Skin infection                                                        | 1              | 8%         | 0             | 0%         | 0               | 0%         | 0                 | 0%         | 0               | 0%         | 12           |
| Upper respiratory infection                                           | 1              | 8%         | 0             | 0%         | 0               | 0%         | 0                 | 0%         | 0               | 0%         | 12           |
| <b>Investigations</b>                                                 |                |            |               |            |                 |            |                   |            |                 |            |              |
| Blood bilirubin increased                                             | 1              | 8%         | 0             | 0%         | 0               | 0%         | 0                 | 0%         | 0               | 0%         | 12           |
| <b>Musculoskeletal and connective tissue disorders</b>                |                |            |               |            |                 |            |                   |            |                 |            |              |
| Arthralgia                                                            | 1              | 8%         | 0             | 0%         | 0               | 0%         | 0                 | 0%         | 0               | 0%         | 12           |
| <b>Nervous system disorders</b>                                       |                |            |               |            |                 |            |                   |            |                 |            |              |
| Headache                                                              | 0              | 0%         | 1             | 8%         | 0               | 0%         | 0                 | 0%         | 0               | 0%         | 12           |
| <b>Respiratory, thoracic, and mediastinal disorders</b>               |                |            |               |            |                 |            |                   |            |                 |            |              |
| Cough                                                                 | 2              | 8%         | 0             | 0%         | 0               | 0%         | 0                 | 0%         | 0               | 0%         | 12           |
| Pleuritic pain                                                        | 1              | 8%         | 0             | 0%         | 0               | 0%         | 0                 | 0%         | 0               | 0%         | 12           |
| <b>Skin and subcutaneous tissue disorders</b>                         |                |            |               |            |                 |            |                   |            |                 |            |              |
| Scalp pain                                                            | 0              | 0%         | 1             | 8%         | 0               | 0%         | 0                 | 0%         | 0               | 0%         | 12           |
| <b>Summary</b>                                                        |                |            |               |            |                 |            |                   |            |                 |            |              |
| <b>Maximum Non-Hematologic AE</b>                                     | <b>6</b>       | <b>50%</b> | <b>5</b>      | <b>42%</b> | <b>0</b>        | <b>0%</b>  | <b>0</b>          | <b>0%</b>  | <b>0</b>        | <b>0%</b>  | <b>12</b>    |
| <b>Maximum Overall AE</b>                                             | <b>6</b>       | <b>50%</b> | <b>5</b>      | <b>42%</b> | <b>0</b>        | <b>0%</b>  | <b>0</b>          | <b>0%</b>  | <b>0</b>        | <b>0%</b>  | <b>12</b>    |
