# Supplementary material for: Long-term survival of patients with stage III colon cancer treated with VRP-CEA(6D), an alphavirus vector that increases the CD8+ effector memory T cell to Treg ratio
Source: PubMed Central journal article supplement (PMC7661359; doi:10.1136/jitc-2020-001662), 2020-11-11
Supplement: jitc-2020-001662supp003.pdf [file jitc-2020-001662supp003.pdf]

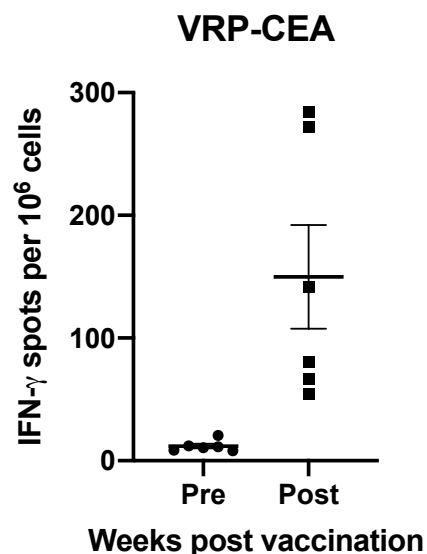

**Supplemental figure 1: CEA-specific ELISPOT responses in the first 6 patients.** Patient sera or PBMCs were analyzed before and after VRP-CEA(6D) for each immunization by VRP-CEA and TRICOM-CEA IFN- $\gamma$  ELISpot for the first six patients on study. Patient PBMCs were stimulated with VRP-CEA or TRICOM-CEA (MOI 10) in an ELISpot assay (previously described). The number of IFN- $\gamma$ -producing cells per  $10^6$  PBMCs is presented as mean  $\pm$  SEM.
